# Supplementary material for: Chromium-Modified Ultrathin CoFe LDH as High-Efficiency Electrode for Hydrogen Evolution Reaction
Source: MDPI journal article supplement (doi:10.3390/nano12071227), 2022-04-06
Supplement: s1 [file s1]

# Supporting Information

## Chromium-Modified Ultrathin CoFe LDH as High-Efficiency Electrode for Hydrogen Evolution Reaction

Jun-Jun Zhang <sup>1,\*</sup>, Meng-Yang Li <sup>1</sup>, Xiang Li <sup>1</sup>, Wei-Wei Bao <sup>2</sup>, Chang-Qing Jin <sup>1</sup>, Xiao-Hua Feng <sup>1</sup>, Ge Liu <sup>1</sup>, Chun-Ming Yang <sup>3</sup> and Nan-Nan Zhang <sup>4</sup>

<sup>1</sup> Shaanxi Key Laboratory of Optoelectronic Functional Materials and Devices, School of Materials Science and Chemical Engineering, Xi'an Technological University, Xi'an 710021, China;

limengyang1997lmy@163.com (M.-Y.L.); lixiang@xatu.edu.cn (X.L.); eaglejin@xatu.edu.cn (C.-Q.J.); fxh1232022@163.com (X.-H.F.); L1462310794@126.com (G.L.)

<sup>2</sup> National & Local Joint Engineering Laboratory for Slag Comprehensive Utilization and Environmental Technology, School of Material Science and Engineering, Shaanxi University of Technology, Hanzhong 723000, China; baowei1834@163.com

<sup>3</sup> Shaanxi Key Laboratory of Chemical Reaction Engineering, College of Chemistry & Chemical Engineering, Yan'an University, Yan'an 716000, China; chunmingyang@yau.edu.cn

<sup>4</sup> Instrumental Analysis Center, Shanghai Jiao Tong University, Shanghai 200240, China; zhangnn19@sjtu.edu.cn

\* Correspondence: zhangjunjun@xatu.edu.cn

# List of Contents

## 1. Experimental Section:

Preparation of Pt/C

## 2. Supplementary Figures:

**Figure S1.** The SEM of CoFeCr LDH electrode.

**Figure S2.** The HRTEM and corresponding fast-Fourier-transform (FFT) of the as-obtained CoFeCr LDH electrode.

**Figure S3.** The EDX of CoFeCr LDH electrode.

**Figure S4.** The chronopotentiometry measurement of CoFeCr LDH electrode.

**Figure S5.** The SEM images of CoFeCr LDH electrode after long-time stability test.

**Figure S6.** The EDX of CoFeCr LDH electrode after long-time stability test.

**Figure S7.** The HRTEM image of CoFeCr LDH electrode after long-time stability test.

**Figure S8.** High-resolution XPS (a) Co 2p, (b) Fe 2p and (c) Cr 2p spectra of CoFeCr LDH electrode before and after long-time stability test.

**Figure S9.** The electron paramagnetic resonance (EPR) spectra of CoFeCr LDH electrode before and after long-time stability test.

**Figure S10.** (a) the polarization curves of the electrode before and after 500 cycles.

(b) the multi-potential steps and (c) the multi-current steps.

**Figure S11.** The comparison of the corresponding overpotentials at 10 mA cm<sup>-2</sup> and 50 mA cm<sup>-2</sup> current outputs based on different deposition time electrodes.

**Figure S12.** The comparison of the corresponding overpotentials at 10 mA cm<sup>-2</sup> and 50 mA cm<sup>-2</sup> current outputs based on different doping concentrations electrodes.

**Figure S13.** The high-resolution (a) Co 2p and (b) Fe 2p spectra of CoFe LDH electrode and CoFe LDH powder.

## 3. Supplementary Tables:

**Table S1.** Summary of parameters for sample preparation.

**Table S2.** Comparison of the HER performance of CoFeCr LDH catalyst with other reported OER catalysts

## 4. Notes and references

# **1. Experimental details**

## **Preparation of Pt/C**

Prior to the synthesis, NFs were sonicated in 3 M HCl, ethanol and ultrapure water for 15min to clean the surface. 1.2mg Pt/C was dispersed into a solution of water, ethanol and Nafion with a volume ratio of 60/120/15 via sonication. Coat a third of the total well-dispersed solution to the cleaned NF surface.

## 2. Supplementary Figures:

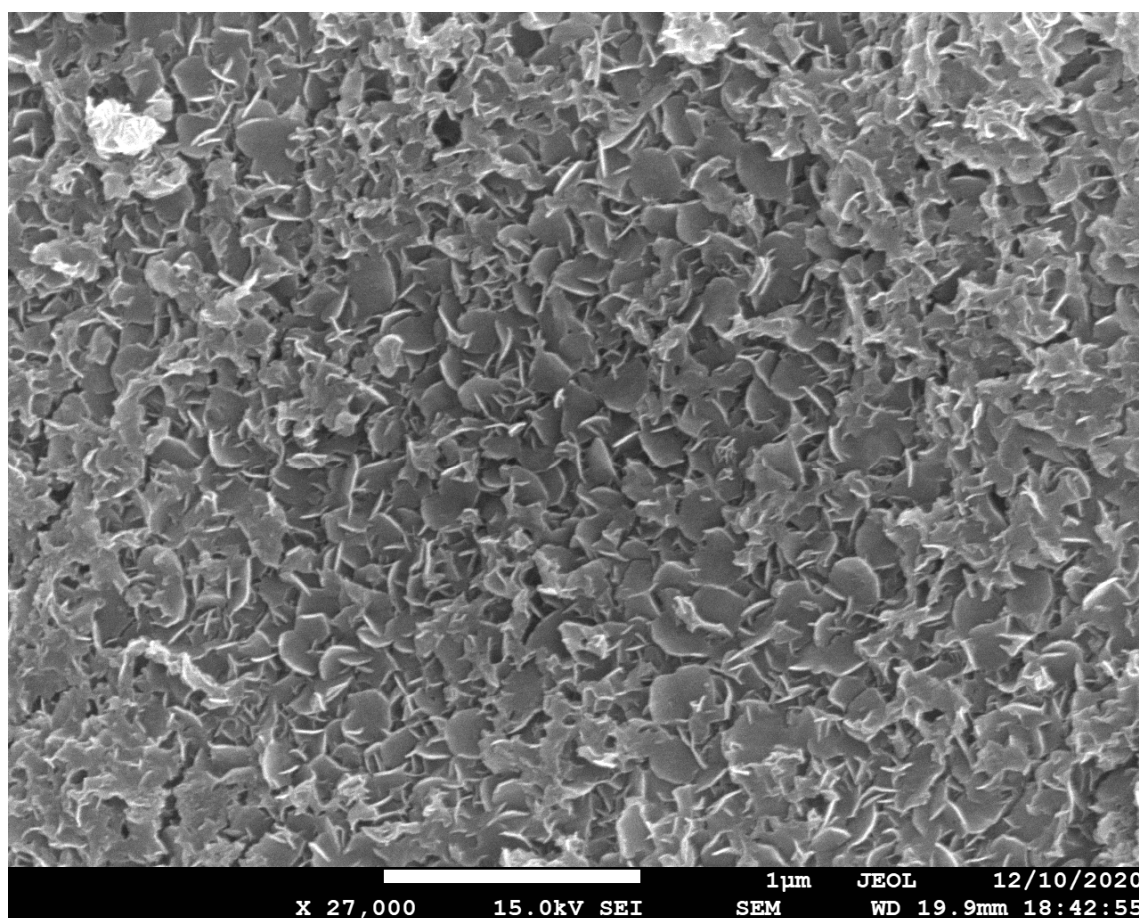

**Figure S1.** The SEM of CoFeCr LDH electrode. The results show that the electrode has obvious array structure, which is beneficial to mass transfer in the catalytic process.

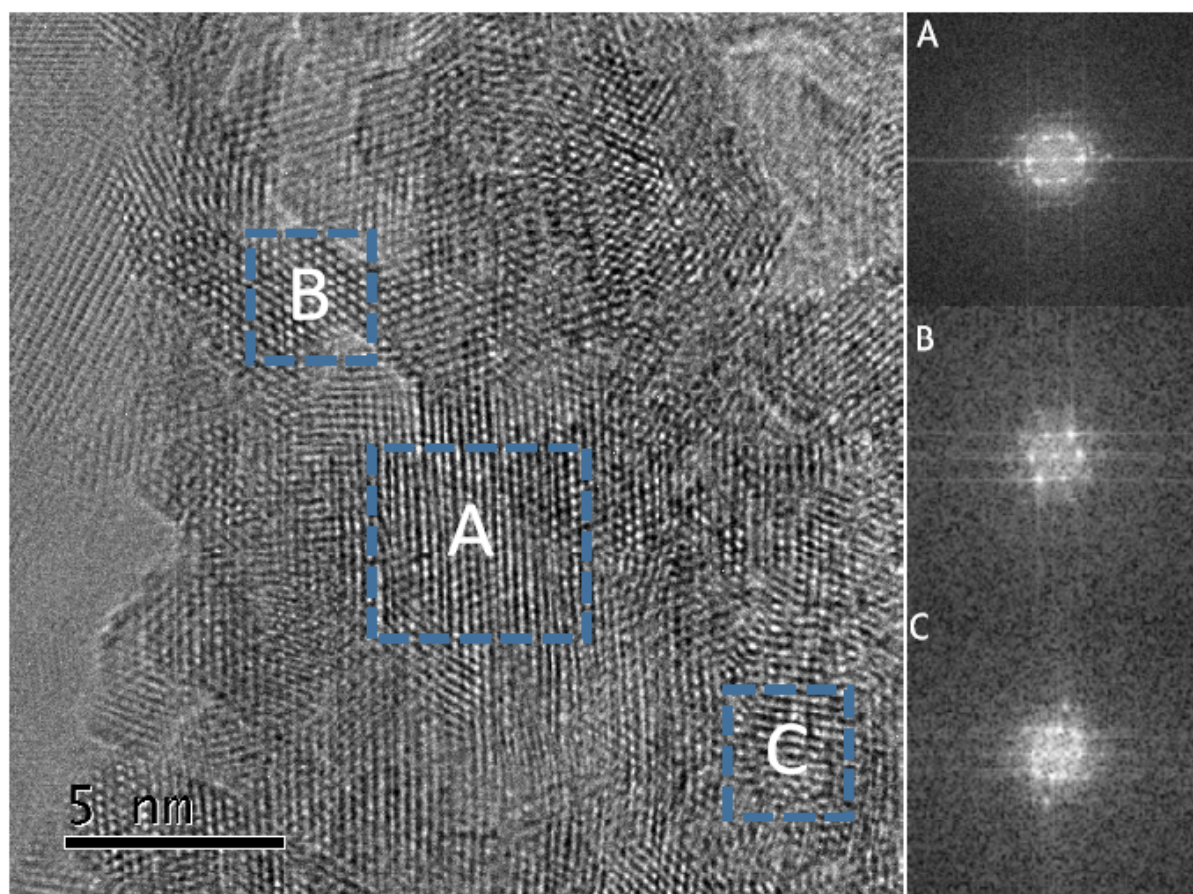

**Figure S2.** The HRTEM and corresponding fast-Fourier-transform (FFT) of the as-obtained CoFeCr LDH electrode. The results show that the sample is polycrystalline in nature.

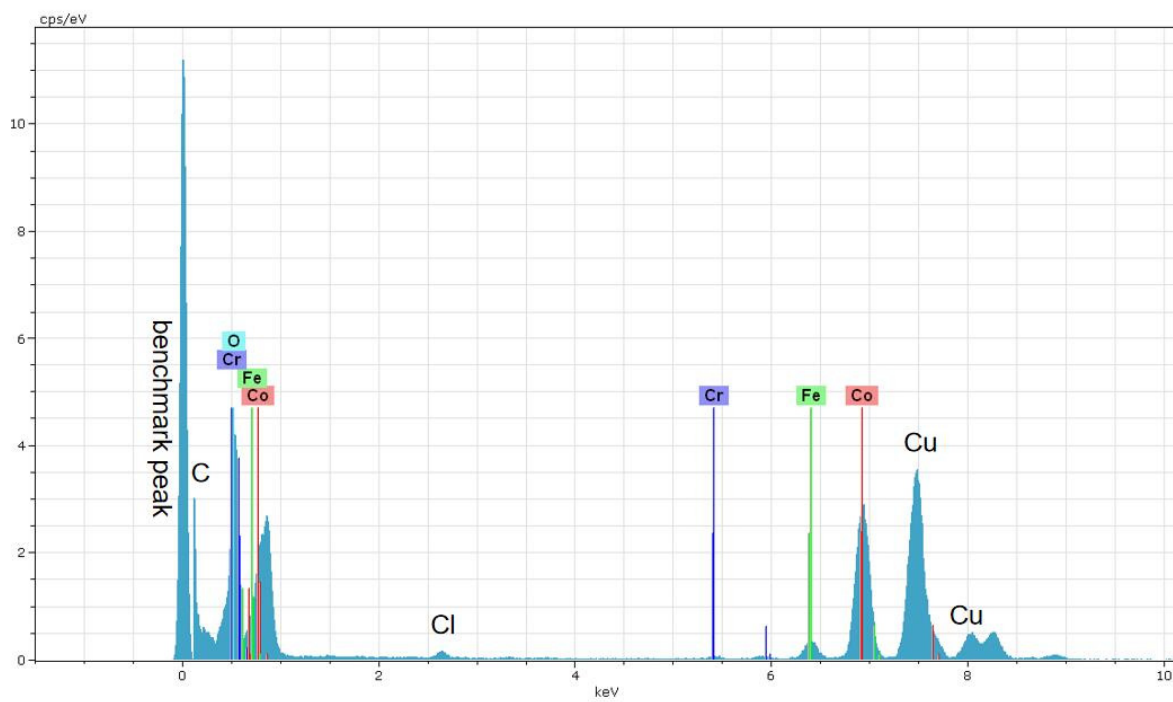

**Figure S3.** The energy-dispersive X-ray (EDX) of CoFeCr LDH electrode.

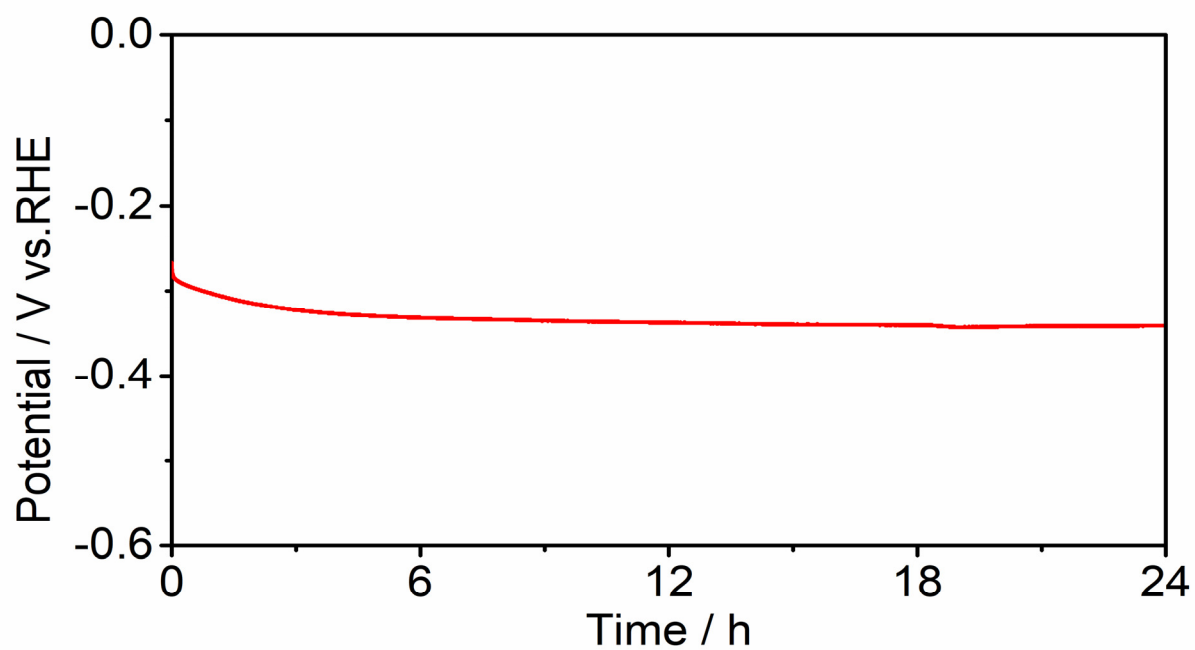

**Figure S4.** The chronopotentiometry measurement of CoFeCr LDH electrode. The current density used for the chronopotentiometry measurement is  $10 \text{ mA cm}^{-2}$ . The electrolyte used for the test is 1.0 M KOH.

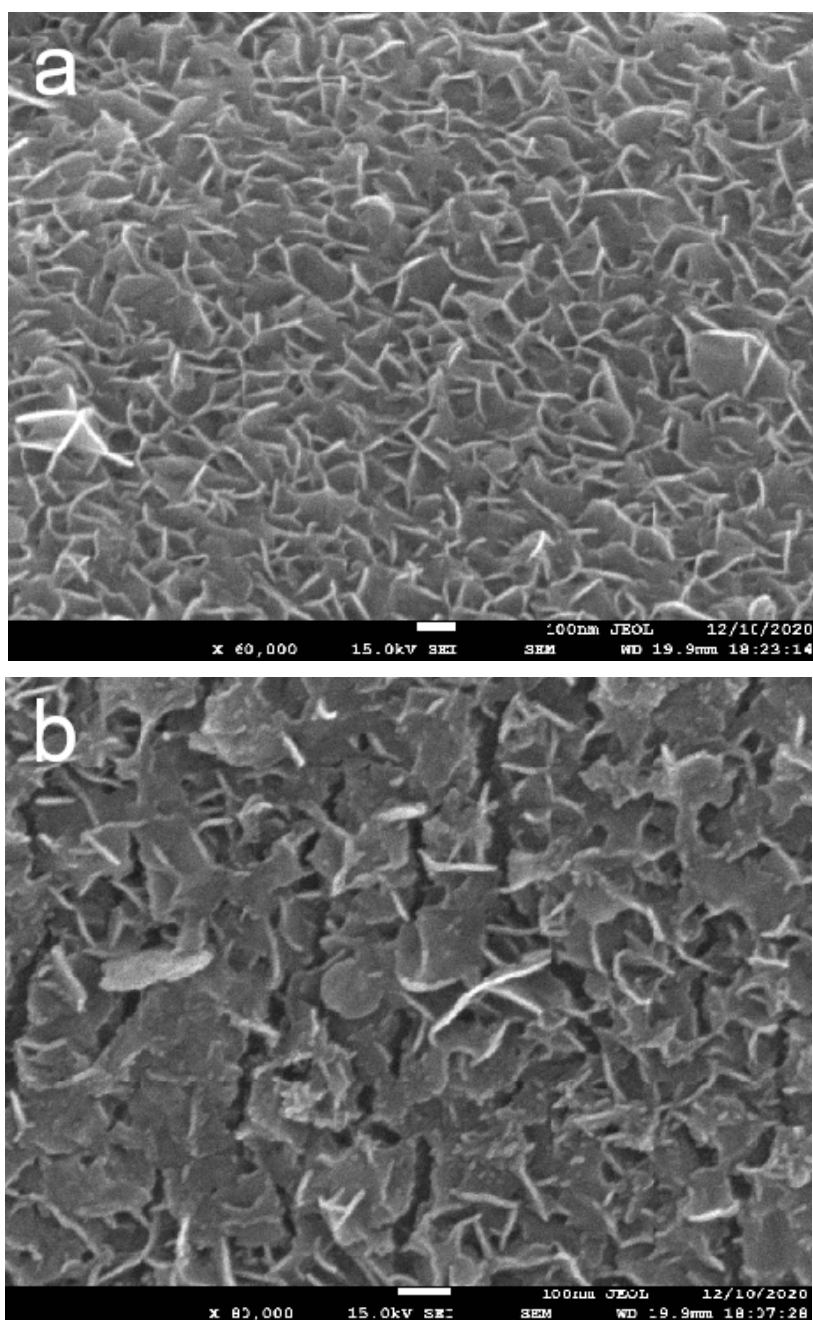

**Figure S5.** The SEM images of CoFeCr LDH electrode after long-time stability test.



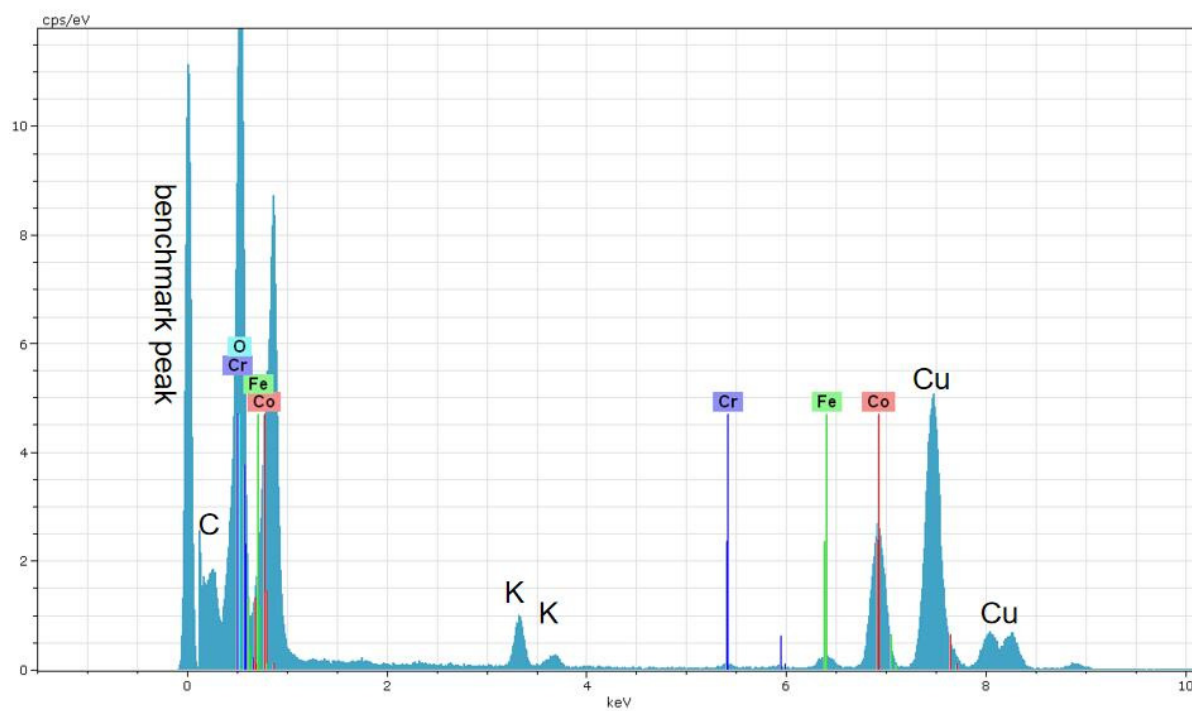

**Figure S6.** The energy-dispersive X-ray (EDX) of CoFeCr LDH electrode after long-time stability test.

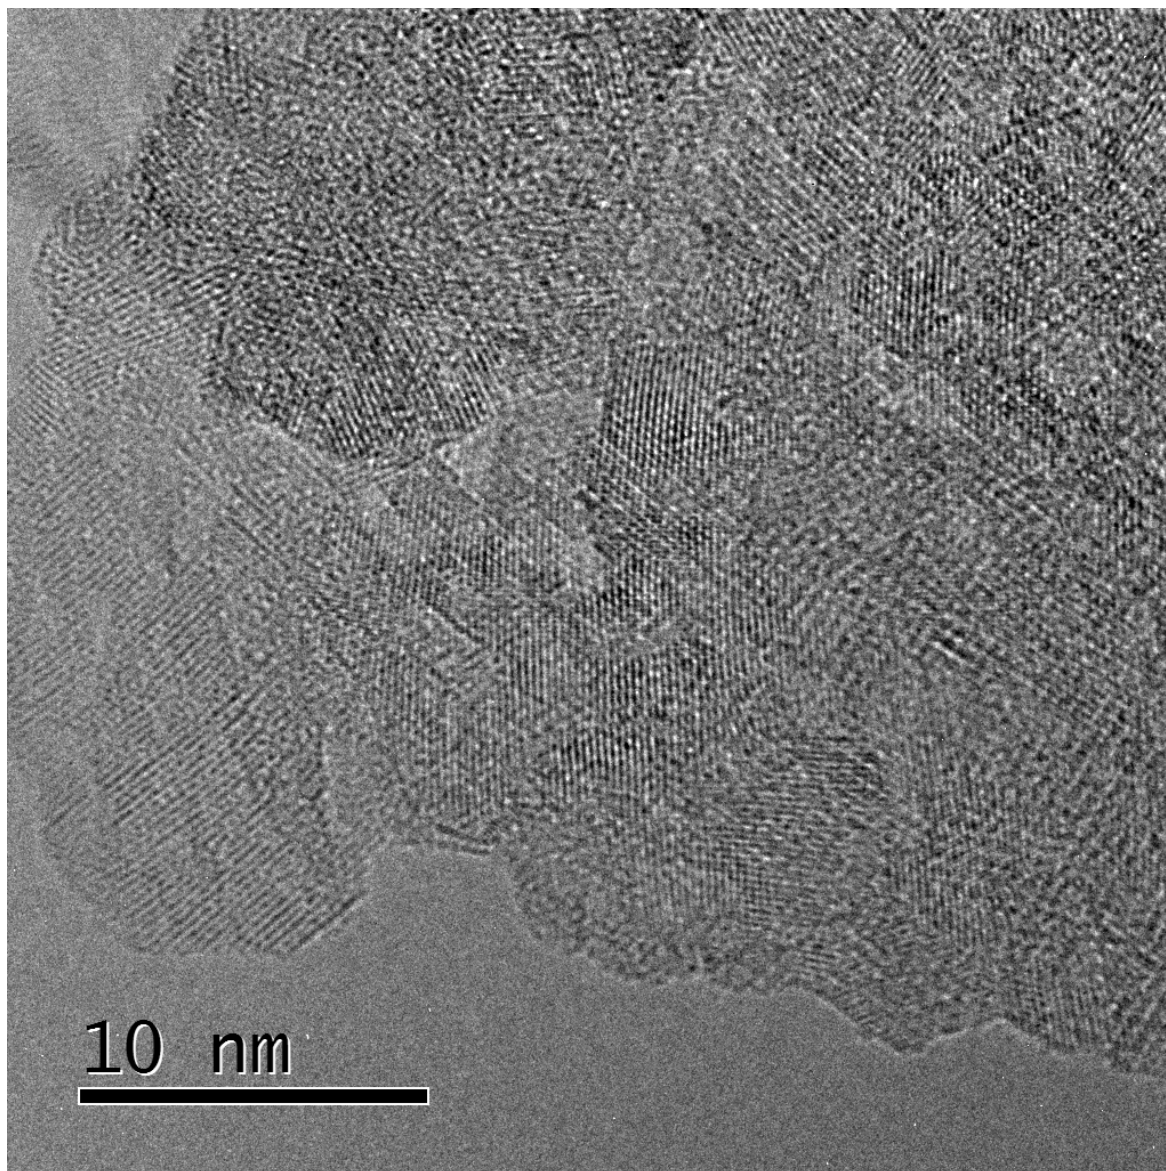

**Figure S7.** The HRTEM image of CoFeCr LDH electrode after long- time stability test.

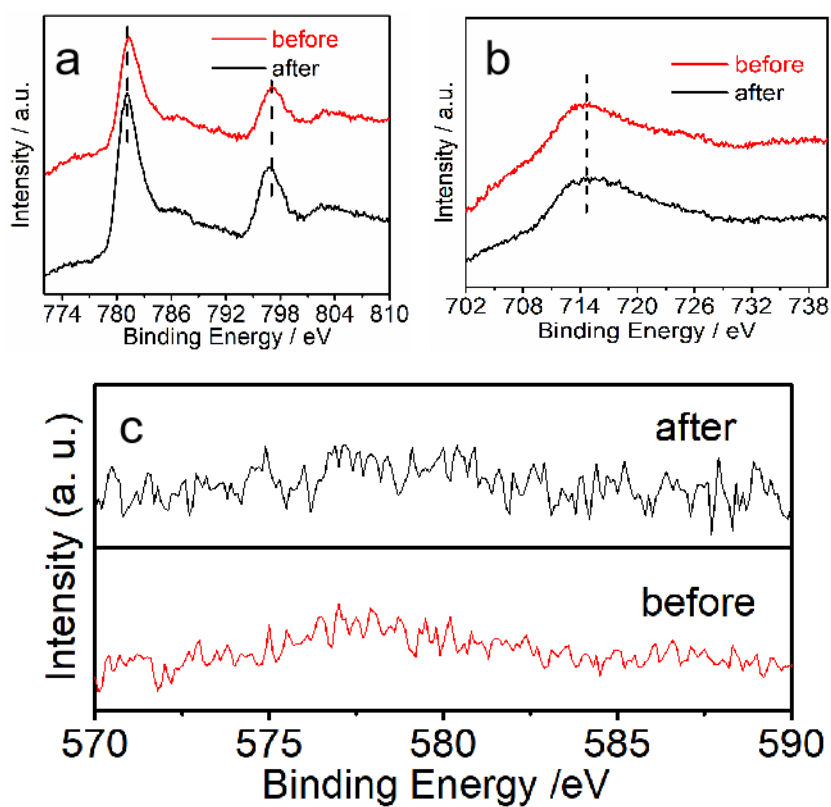

**Figure S8.** High-resolution XPS (a) Co 2p, (b) Fe 2p and (c) Cr 2p spectra of CoFeCr LDH electrode before and after long-time stability test.

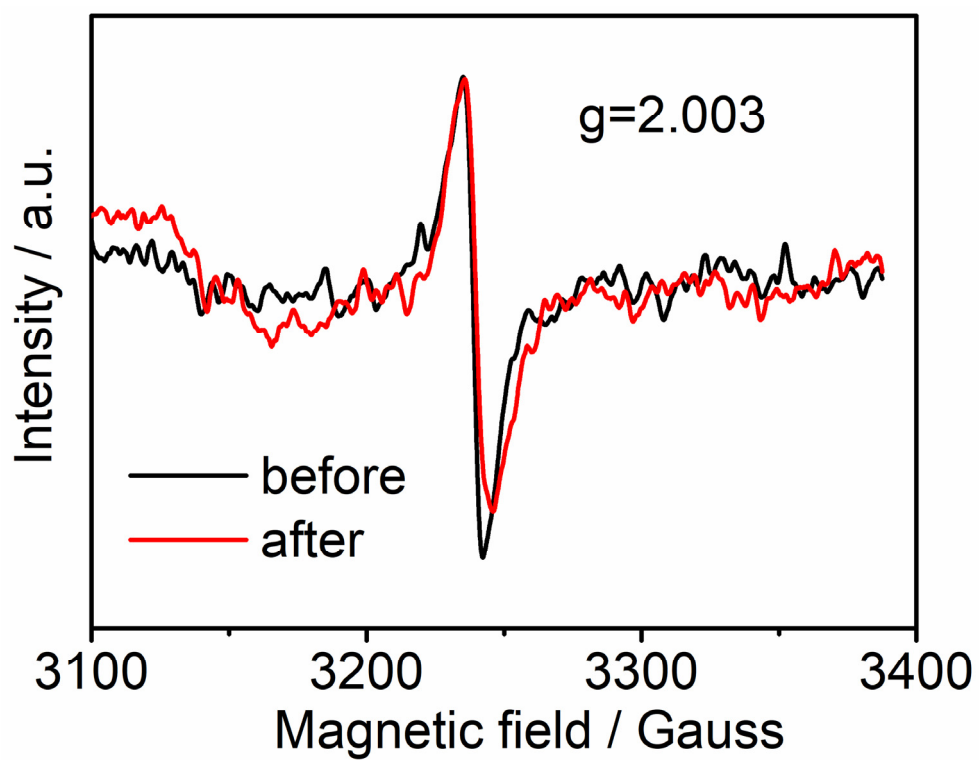

**Figure S9.** The electron paramagnetic resonance (EPR) spectra of CoFeCr LDH electrode before and after long time stability test.

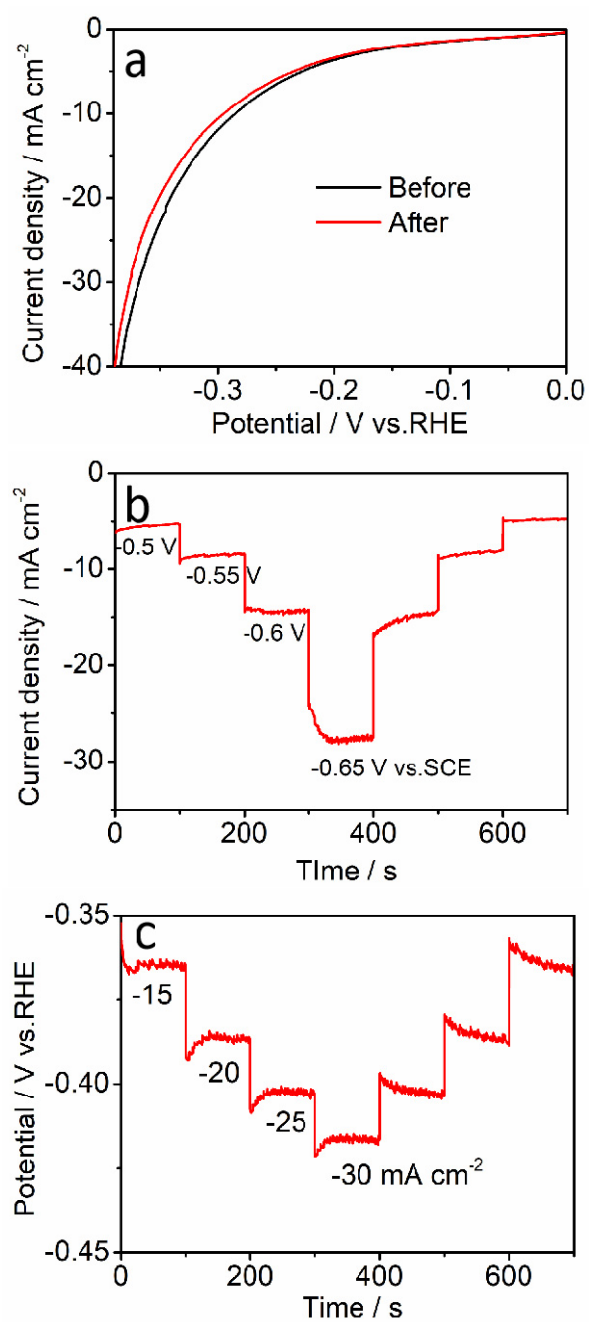

**Figure S10.** (a) the polarization curves of the electrode before and after 500 cycles. (b) the multi-potential steps and (c) the multi-current steps results.

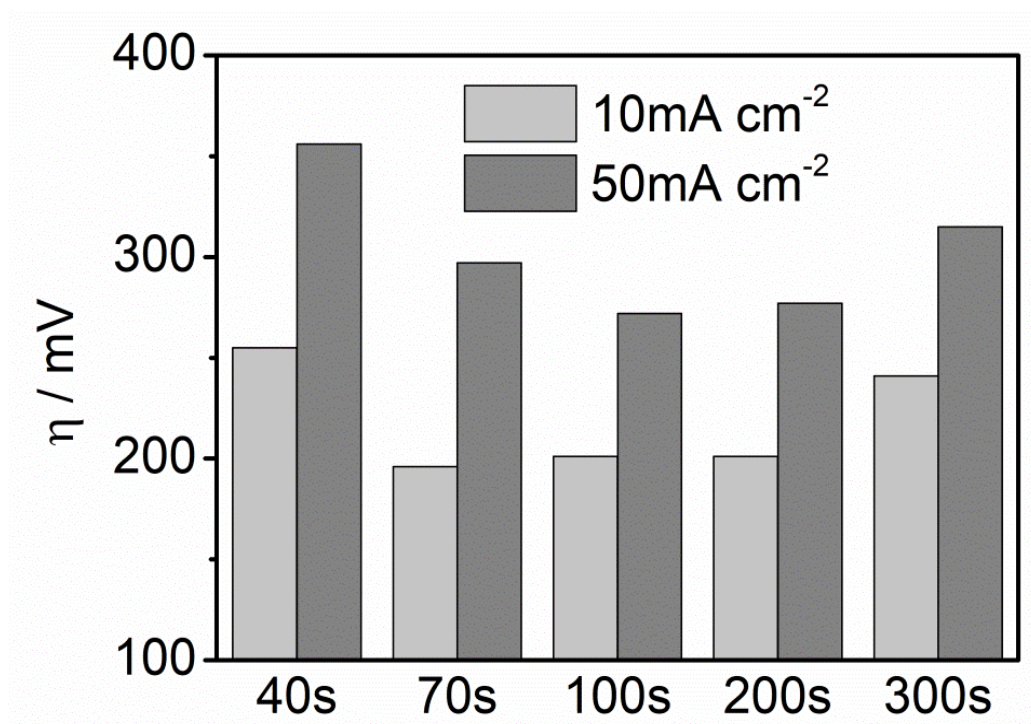

**Figure S11.** The comparison of the corresponding overpotentials at  $10 \text{ mA cm}^{-2}$  and  $50 \text{ mA cm}^{-2}$  current outputs based on different deposition time electrodes.

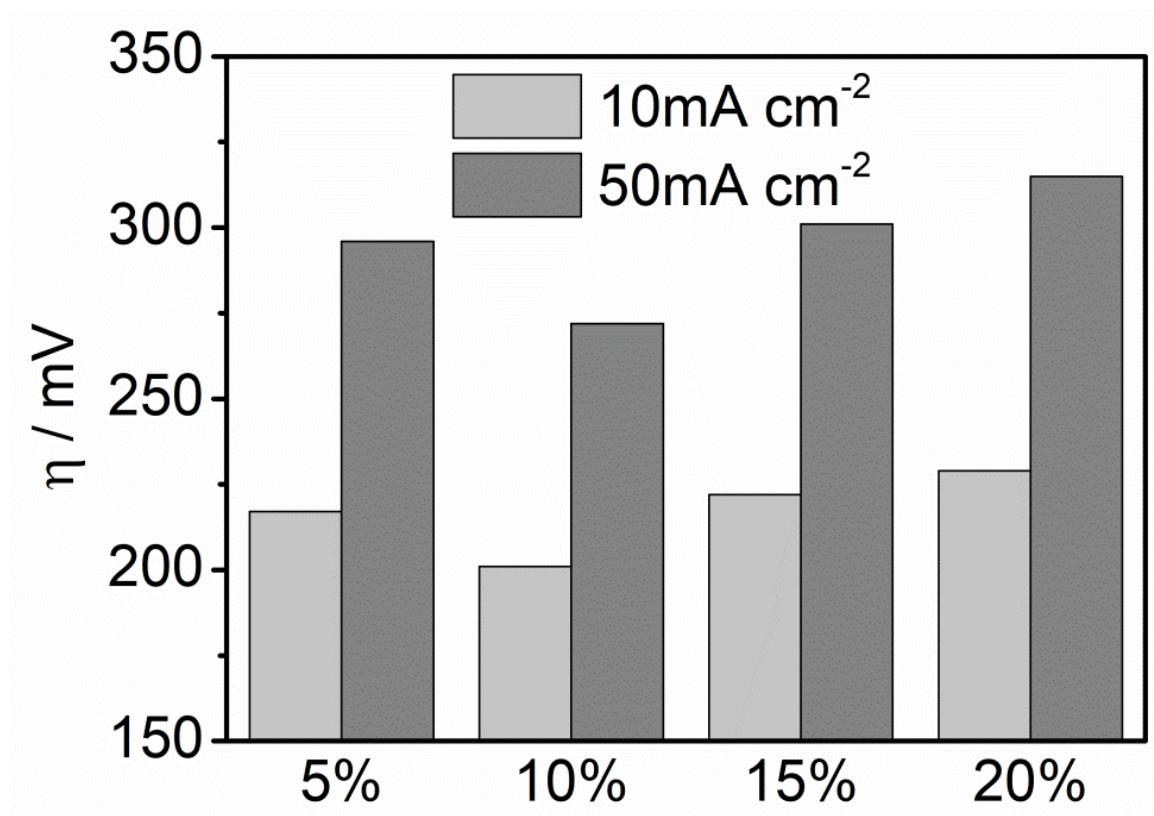

**Figure S12.** The comparison of the corresponding overpotentials at  $10 \text{ mA cm}^{-2}$  and  $50 \text{ mA cm}^{-2}$  current outputs based on different doping concentrations electrodes.

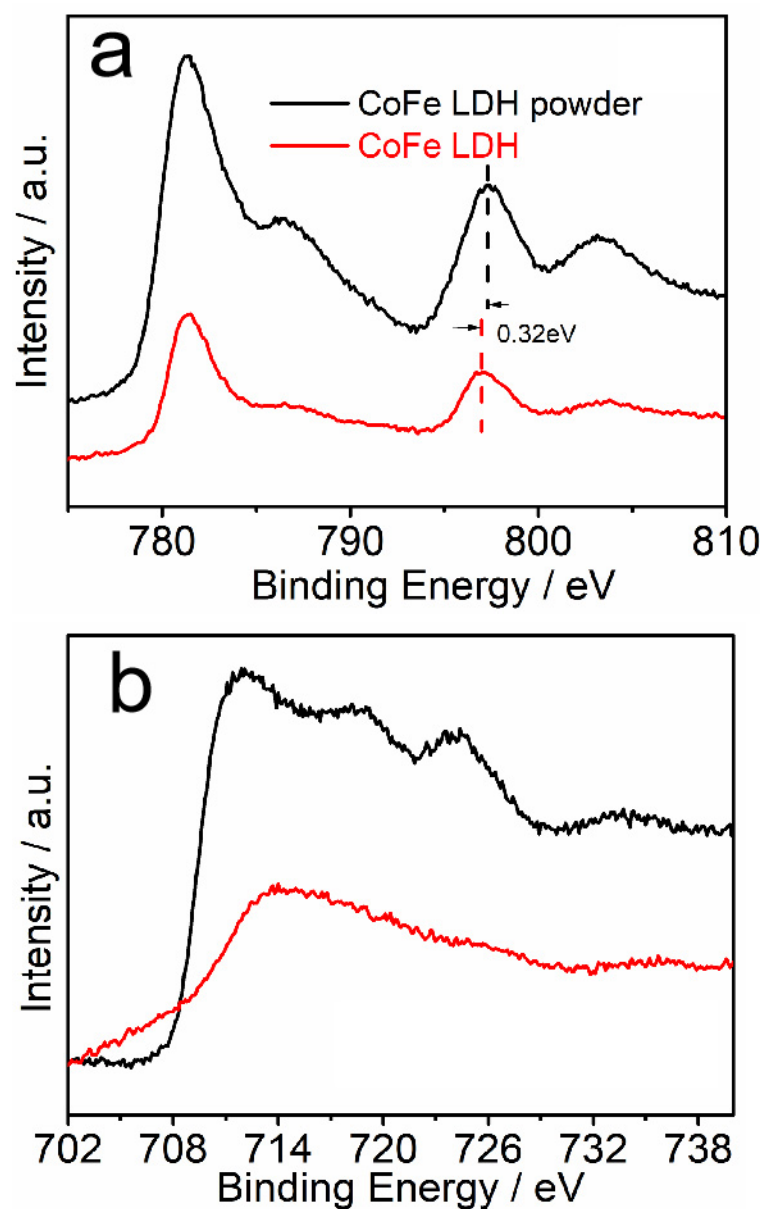

**Figure.S13** The high-resolution (a) Co 2p and (b) Fe 2p spectra of CoFe LDH electrode and CoFe LDH powder. CoFe LDH powder sample was prepared according to our previously published article<sup>[16]</sup>.



### 3. Supplementary Tables

**Table S1.** Summary of parameters for sample preparation.

| Doping concentration | $\text{Cr}(\text{NO}_3)_3 \cdot 9\text{H}_2\text{O}$<br>(mmol) | $\text{FeCl}_2 \cdot 4\text{H}_2\text{O}$<br>(mmol) | $\text{Co}(\text{NO}_3)_2 \cdot 6\text{H}_2\text{O}$<br>(mmol) |
|----------------------|----------------------------------------------------------------|-----------------------------------------------------|----------------------------------------------------------------|
| 0                    | 0                                                              | 1.25                                                |                                                                |
| 5%                   | 0.1875                                                         | 1.0625                                              |                                                                |
| 10%                  | 0.375                                                          | 0.875                                               | 2.5                                                            |
| 15%                  | 0.5625                                                         | 0.6875                                              |                                                                |
| 20%                  | 0.75                                                           | 0.5                                                 |                                                                |

**Table S2.** Comparison of the HER performance of CoFeCr LDH catalyst with other reported OER catalysts

| Catalyst                                  | Tafel slope<br>(mV dec <sup>-1</sup> ) | Overpotential<br>( $\eta$ /mV) Vs.<br>10mA cm <sup>-2</sup> | Electrolyte                          | Reference                                                              |
|-------------------------------------------|----------------------------------------|-------------------------------------------------------------|--------------------------------------|------------------------------------------------------------------------|
| <b>Cr-CoFe LDH</b>                        | <b>105</b>                             | <b>201</b>                                                  | <b>1 M KOH</b>                       | <b>This work</b>                                                       |
| Co/CoP                                    | 73.8                                   | 253                                                         | 1 M KOH                              | <i>Advanced Energy Materials</i> , 2017, 7, 1602355.                   |
| Mesoporous Thin-Film NiS <sub>2</sub>     | N/A                                    | 250                                                         | 1 M KOH                              | <i>ACS Catalysis</i> , 2020, 10, 15114–15122.                          |
| NiFe-LDH/NF                               | 58.9                                   | 210                                                         | 1 M KOH                              | <i>Science</i> , 2014, 345, 1593–1596.                                 |
| 1T-MoS <sub>2</sub>                       | 56                                     | 270                                                         |                                      | <i>Int. J. Hydrogen Energy</i> , 2021, 46, 8377-8390                   |
| Zn <sub>1-x</sub> Fe <sub>x</sub> -LDH/NF | 110                                    | 221                                                         | 1 M KOH                              | <i>Small</i> , 2018, 14, 1803638.                                      |
| EG/Co <sub>0.85</sub> Se/NiFe-LDH         | 160                                    | 265                                                         | 1 M KOH                              | <i>Energy Environ. Sci.</i> , 2016, 9, 478–483.                        |
| Co <sub>9</sub> S <sub>8</sub> @NOSC      | 105                                    | 320                                                         | 1 M KOH                              | <i>Advanced Science</i> , 2018, 5, 1700464                             |
| Ni <sub>1-x</sub> Fe <sub>x</sub> -LDH    | 110                                    | 242                                                         | 1 M KOH                              | <i>ACS Applied Materials &amp; Interfaces</i> , 2018, 10, 42453–42468. |
| NdBaMn <sub>2</sub> O <sub>5.5</sub>      | 87                                     | 290                                                         | 1 M KOH                              | <i>ACS Catalysis</i> , 2017, 8, 364-371.                               |
| CoMoV LDH/NF                              | 182                                    | 270                                                         | 1 M KOH                              | <i>Chemical Communications</i> , 2019, 55, 3521- 3524.                 |
| NiFe-LDH NS/DG10                          | 210                                    | 300                                                         | 1 M KOH                              | <i>Advanced Materials</i> , 2017, 29, 1700017.                         |
| CoP@BCN                                   | 52                                     | 215                                                         | 1 M KOH                              | <i>Advanced Science</i> , 2018, 5, 1700464.                            |
| CoFe LDH-F                                | 95                                     | 255                                                         | 1 M KOH                              | <i>ACS Applied Materials &amp; Interfaces</i> , 2016, 8, 34474–34481.  |
| CoFeNiMo@NCNT                             | 67.4                                   | 209.9                                                       | 0.5 M H <sub>2</sub> SO <sub>4</sub> | <i>Applied Catalysis B: Environmental</i> , 2021, 280, 119421.         |
| NiFe-LDH/FeCoS <sub>2</sub> /CFC          | 157                                    | 308                                                         | 1 M KOH                              | <i>Journal of Materials Science</i> , 2020, 55, 16625–16640.           |
| Ni/NiS                                    | 123.3                                  | 230                                                         | 1 M KOH                              | <i>Advanced Functional Materials</i> , 2016, 26, 3314–3323.            |

## 4. Notes and references.

1. ZhongHua Xue, Hui Su, QiuYing Yu, Bing Zhang, HongHui Wang, XinHao Li, JieSheng Chen, Janus Co/CoP nanoparticles as efficient Mott-Schottky electrocatalysts for overall water splitting in wide pH range, *Advanced Energy Materials*, **2017**, 7, 1602355.
2. Cüneyt Karakaya, Navid Solati, Umut Savacı, Emre Keles, Servet Turan, Serdar C. Alebi, and Sarp Kay, Mesoporous thin-film NiS<sub>2</sub> as an idealized pre-electrocatalyst for a hydrogen evolution reaction. *ACS Catalysis*, **2020**, 10, 15114–15122.
3. Jingshan Luo, Jeong-Hyeok Im, Matthew T. Mayer, Marcel Schreier, Mohammad Khaja Nazeeruddin, Nam-Gyu Park, S. David Tilley, Hong Jin Fan, Michael Grätzel, Water photolysis at 12.3% efficiency via perovskite photovoltaics and Earth-abundant catalysts. *Science*, **2014**, 345, 1593–1596.
4. Selvaraj Venkateshwaran, Mukkath Joseph Josline, Sakkarapalayam Murugesan Senthil Kumar, Fine-tuning interlayer spacing in MoS<sub>2</sub> for enriching 1T phase via alkylated ammonium ions for electrocatalytic hydrogen evolution reaction, *International Journal of Hydrogen Energy*, **2021**, 46, 8377–8390.
5. Gaddam Rajeshkhanna, Syam Kandula, Khem Raj Shrestha, Nam Hoon Kim, Joong Hee Lee, A new class of Zn<sub>1-x</sub>Fe<sub>x</sub>-oxyselenide and Zn<sub>1-x</sub>Fe<sub>x</sub>-LDH nanostructured material with remarkable bifunctional oxygen and hydrogen evolution electrocatalytic activities for overall water splitting, *Small*, **2018**, 14, 1803638.
6. Yang Hou, Martin R. Lohe, Jian Zhang, Shaohua Liu, Xiaodong Zhuang, Xinliang Feng, Vertically oriented cobalt selenide/NiFe layered-double-hydroxide nanosheets supported on exfoliated graphene foil: an efficient 3D electrode for overall water splitting, *Energy Environ. Sci.*, **2016**, 9, 478–483.
7. Nasir Mahmood, Yunduo Yao, Jing-Wen Zhang, Lun Pan, Xiangwen Zhang, Ji-Jun Zou, Electrocatalysts for hydrogen evolution in alkaline electrolytes: mechanisms, challenges, and prospective solutions, *Advanced Science*, **2018**, 5, 1700464.
8. Gaddam Rajeshkhanna, Thangjam Ibomcha Singh, Nam Hoon Kim, Joong-Hee Lee, Remarkable bifunctional oxygen and hydrogen evolution electrocatalytic activities with trace level Fe-doping in Ni- and Co-layered double hydroxides for overall water splitting. *ACS Applied Materials & Interfaces*, **2018**, 10, 42453–42468.
9. Jian Wang, Yang Gao, Dengjie Chen, Jiapeng Liu, Zhenbao Zhang, Zongping Shao, Francesco Ciucci, Water splitting with an enhanced bifunctional double perovskite. *ACS Catalysis*, **2017**, 8, 364–371.
10. Jian Bao, Zhaolong Wang, Junfeng Xie, Li Xu, Fengcai Lei, Meili Guan, Yan Zhao, Yunpeng Huang, Huaming Li, Ternary cobalt-molybdenum-vanadium layered double hydroxide nanosheet array as an efficient bifunctional electrocatalyst for overall water splitting. *Chemical Communications*, **2019**, 55, 3521–3524.
11. Yi Jia, Longzhou Zhang, Guoping Gao, Hua Chen, Bei Wang, Jizhi Zhou, Mun Teng Soo, Min Hong, Xuecheng Yan, Guangren Qian, Jin Zou, Aijun Du, Xiangdong Yao, A heterostructure coupling of exfoliated Ni-Fe hydroxide nanosheet and defective graphene as a bifunctional electrocatalyst for overall water splitting. *Advanced Materials*, **2017**, 29, 1700017.
12. Peng Fei Liu, Shuang Yang, Bo Zhang, Hua Gui Yang, Defect-rich ultrathin cobalt-iron layered double hydroxide for electrochemical overall water splitting, *ACS Applied Materials & Interfaces*, **2016**, 8, 34474–34481.
13. Ting Wang, Ming Xu, Fengrui Li, Yunjiang Li, Weilin Chen, Multimetal-based nitrogen doped carbon nanotubes bifunctional electrocatalysts for triiodide reduction and water-splitting synthesized from polyoxometalate-intercalated layered double hydroxide pyrolysis strategy, *Applied Catalysis B: Environmental*, **2021**, 280, 119421.
14. Zewu Zhang, Jiamin Zhou, Hanlin Wei, Yifan Dai, Shijia Li, Haojun Shi, Gang Xu, Construction of hierarchical NiFe-LDH/FeCoS<sub>2</sub>/CFC composites as efficient bifunctional electrocatalysts for hydrogen and oxygen evolution reaction, *Journal of Materials Science*, **2020**, 55, 16625–16640.
15. Gao-Feng Chen, Tian Yi Ma, Zhao-Qing Liu, Nan Li, Yu-Zhi Su, Kenneth Davey, Shi-Zhang Qiao, Efficient and stable bifunctional electrocatalysts Ni/Ni<sub>x</sub>M<sub>y</sub> (M = P, S) for overall water splitting, *Advanced Functional Materials*, **2016**, 26, 3314–3323.
16. M. Y. Li, J. J. Zhang, X. Li, W. W. Bao, C. M. Yang, C. Q. Jin, M. Li, S. M. Wang and N. N. Zhang, Tuning the electronic structures of self-supported vertically aligned CoFe LDH arrays integrated with Ni foam toward highly efficient electrocatalytic water oxidation, *New J. Chem.*, **2021**, 45, 13266–13270.
